# Supplementary material for: Band engineering of AgSb1−xBixO3 for photocatalytic water oxidation under visible light
Source: Royal Society of Chemistry journal article supplement (doi:10.1039/c5ta01020a), 2015-01-01
Supplement: c5ta01020a1.pdf [file c5ta01020a1.pdf]

**Supplementary Information for**  
**Band engineering of  $\text{AgSb}_{1-x}\text{Bi}_x\text{O}_3$  for photocatalytic water**  
**oxidation under visible light**

Zuju Ma,<sup>1</sup> Kechen Wu,<sup>1,a)</sup> Baozhen Sun,<sup>1,2</sup> and Chao He<sup>1</sup>

*<sup>1</sup>State Key Laboratory of Structural Chemistry, Fujian Institute of Research on the Structure of Matter, Chinese Academy of Sciences, Fuzhou 350002, People's Republic of China*

*<sup>2</sup>School of Chemistry and Chemical Engineering, Guangxi University, Nanning 530004, China*

---

<sup>a)</sup> Author to whom correspondence should be addressed. Electronic mail: [wkc@fjirsm.ac.cn](mailto:wkc@fjirsm.ac.cn).

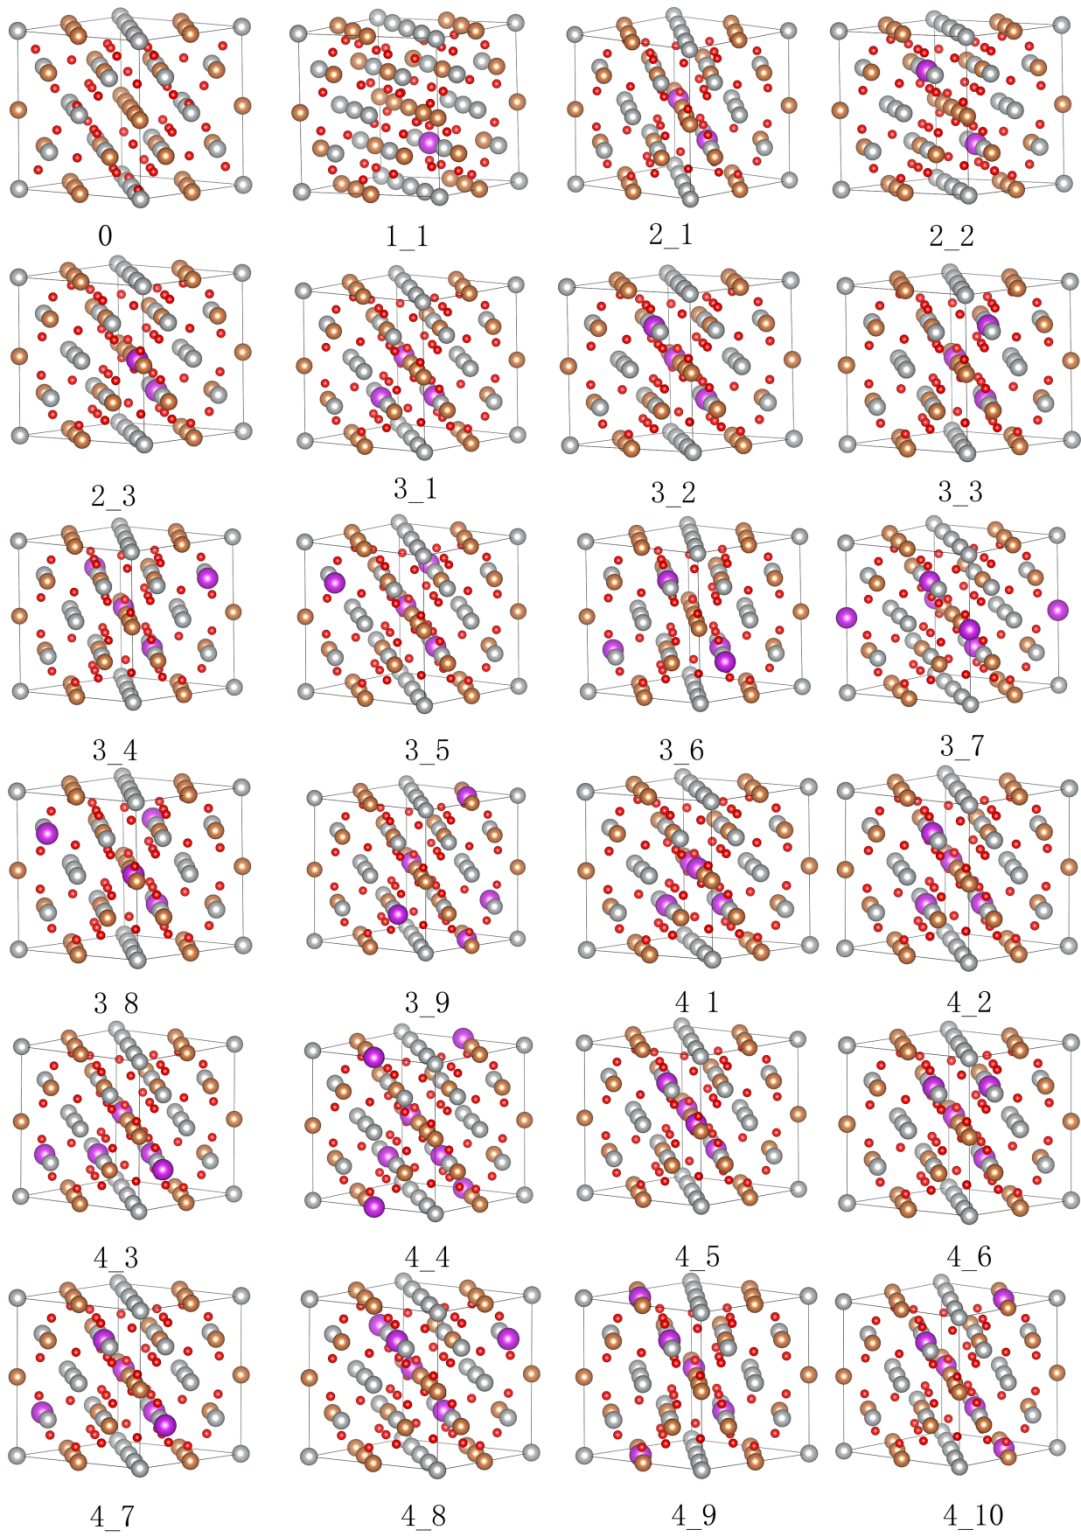

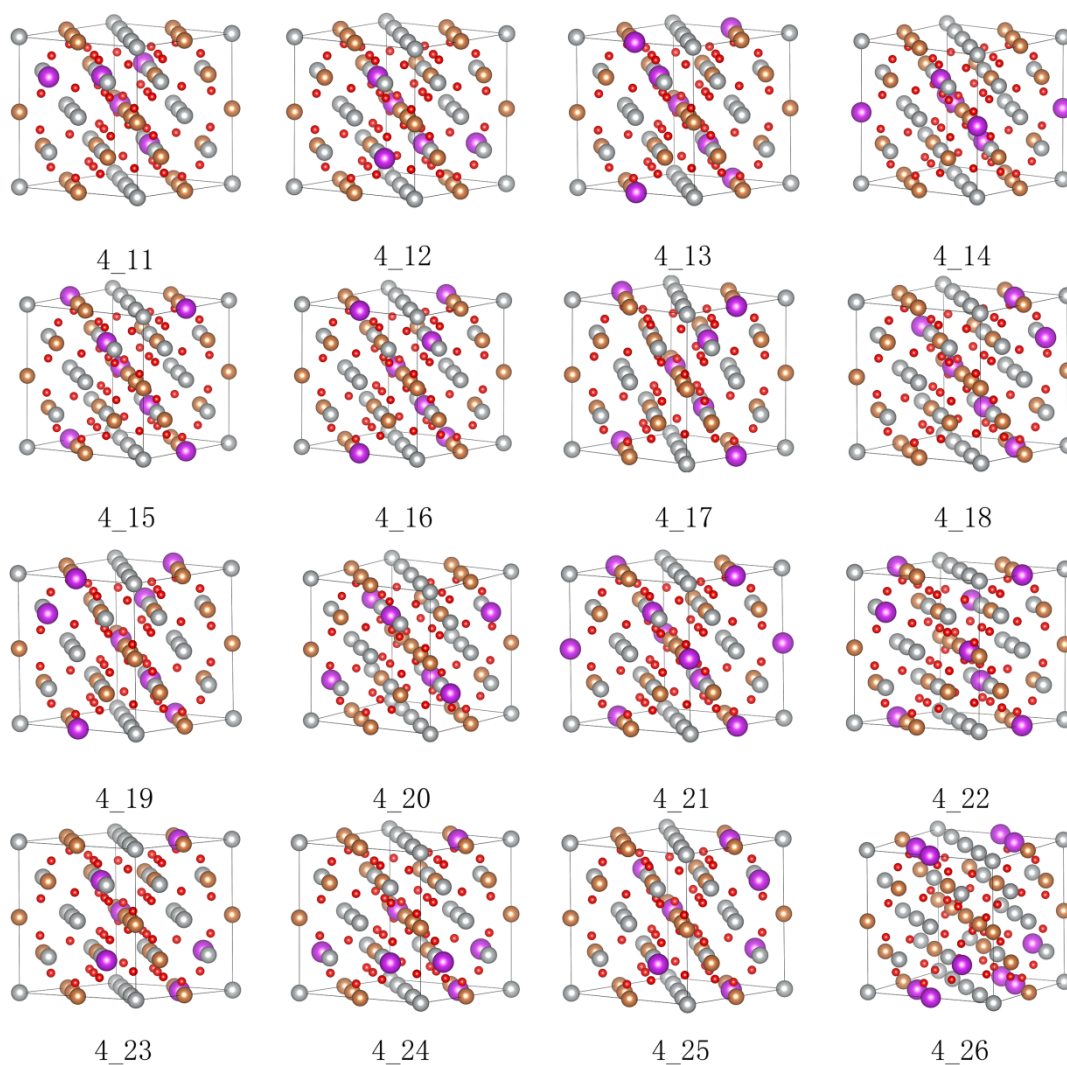

Figure S1. The optimized 80-atom supercell of  $\text{AgSb}_{1-x}\text{Bi}_x\text{O}_3$  solid-solution with the defective pyrochlore structure. The value of “a” in “a\_b” represents the number of Bi atom in the supercell. “b” represents the sequence number of all inequivalent configurations with same Bi concentration. Ag, Sb, Bi, and O atoms are colored by silver, brown, purple and red, respectively.

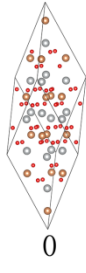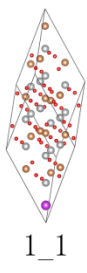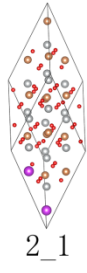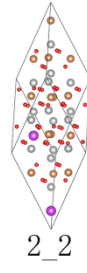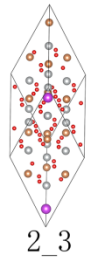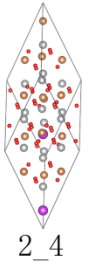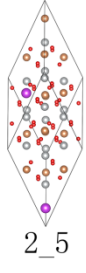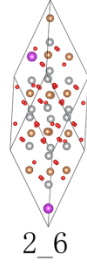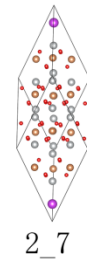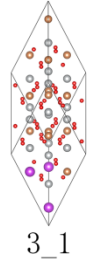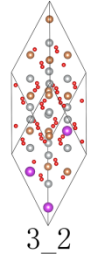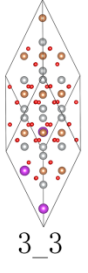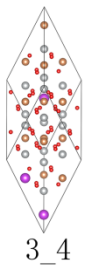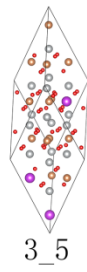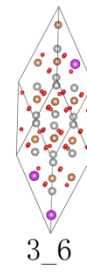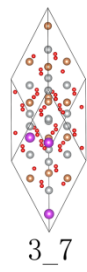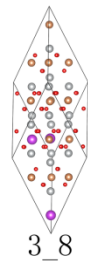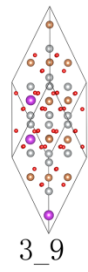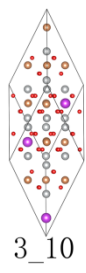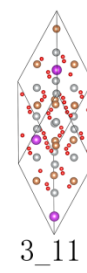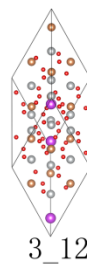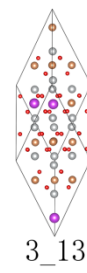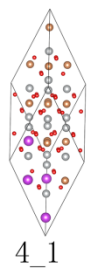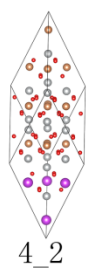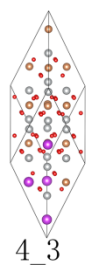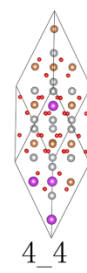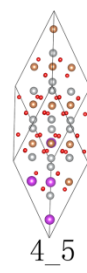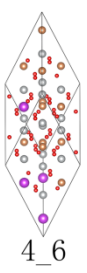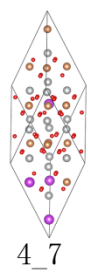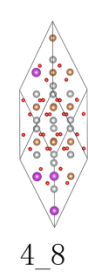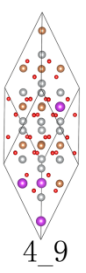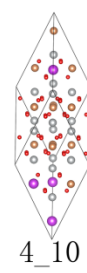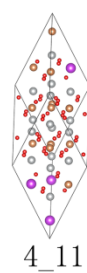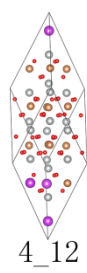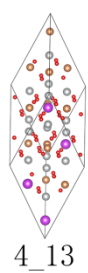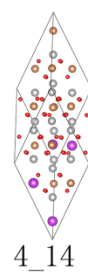

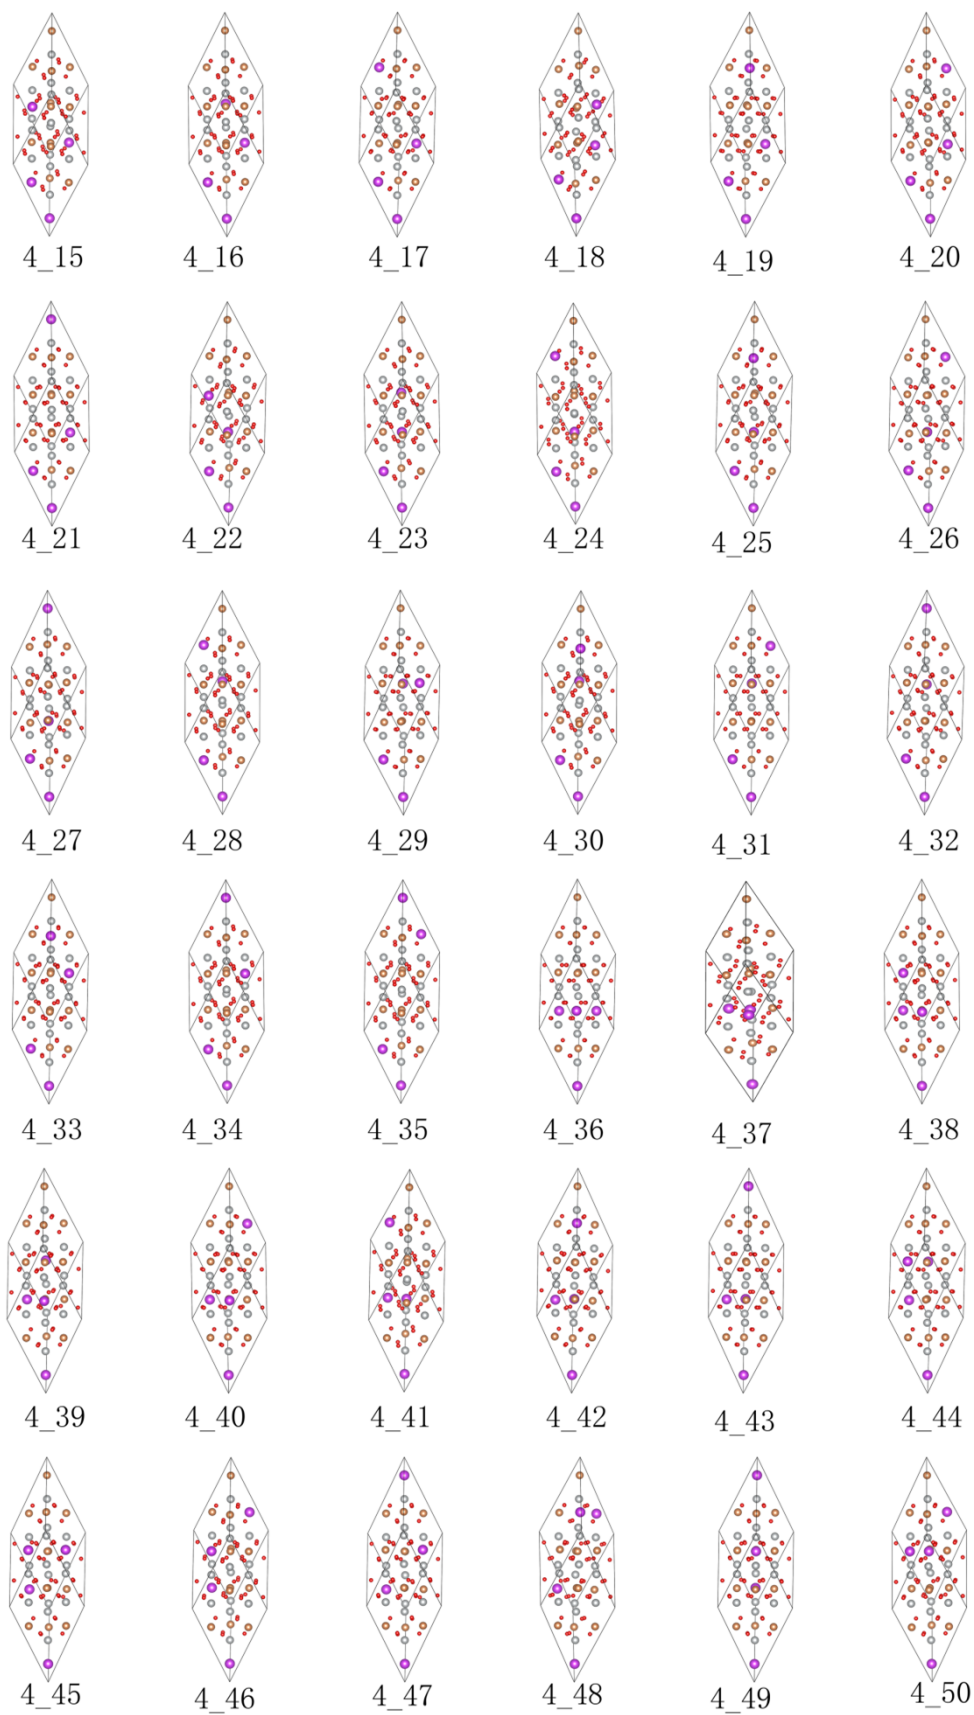

Figure S2. The optimized 80-atom supercell of  $\text{AgSb}_{1-x}\text{Bi}_x\text{O}_3$  solid-solution with the ilmenite structure.

Table S1. The relaxed lattice constants, degeneracy, total energy and band gap ( $E_g$ ) for  $\text{AgSb}_{1-x}\text{Bi}_x\text{O}_3$  solid-solution with the defective pyrochlore structure.

| py- $\text{AgSb}_{1-x}\text{Bi}_x\text{O}_3$ | Degeneracy | Volume( $\text{\AA}^3$ ) | a( $\text{\AA}$ ) | b( $\text{\AA}$ ) | c( $\text{\AA}$ ) | Energy(eV) | $E_g$ (eV) |
|----------------------------------------------|------------|--------------------------|-------------------|-------------------|-------------------|------------|------------|
| 0                                            | 1          | 1105.94                  | 10.3410           | 10.3410           | 10.3410           | -453.342   | 2.50       |
| 1_1                                          | 16         | 1116.76                  | 10.3750           | 10.3750           | 10.3750           | -450.691   | 2.34       |
| 2_1                                          | 48         | 1126.61                  | 10.4065           | 10.4065           | 10.4032           | -448.006   | 2.20       |
| 2_2                                          | 24         | 1126.91                  | 10.4101           | 10.4045           | 10.4045           | -448.115   | 2.14       |
| 2_3                                          | 48         | 1126.71                  | 10.4076           | 10.4076           | 10.4021           | -448.010   | 2.19       |
| 3_1                                          | 32         | 1134.20                  | 10.4287           | 10.4287           | 10.4287           | -445.298   | 2.10       |
| 3_2                                          | 191        | 1134.55                  | 10.4352           | 10.4303           | 10.4240           | -445.414   | 2.03       |
| 3_3                                          | 96         | 1135.33                  | 10.4313           | 10.4313           | 10.4339           | -445.321   | 2.07       |
| 3_4                                          | 48         | 1134.68                  | 10.4298           | 10.4298           | 10.4310           | -445.404   | 2.05       |
| 3_5                                          | 96         | 1137.62                  | 10.4411           | 10.4354           | 10.4411           | -445.333   | 2.07       |
| 3_6                                          | 16         | 1135.01                  | 10.4313           | 10.4313           | 10.4313           | -445.627   | 1.92       |
| 3_7                                          | 48         | 1134.80                  | 10.4268           | 10.4324           | 10.4324           | -445.411   | 2.02       |
| 3_8                                          | 32         | 1135.58                  | 10.4329           | 10.4329           | 10.4329           | -445.314   | 2.07       |
| 3_9                                          | 1          | 1134.68                  | 10.4245           | 10.4307           | 10.4355           | -445.415   | 2.03       |
| 4_1                                          | 8          | 1142.65                  | 10.4545           | 10.4545           | 10.4545           | -442.585   | 2.02       |
| 4_2                                          | 96         | 1143.31                  | 10.4635           | 10.4531           | 10.4531           | -442.720   | 1.95       |
| 4_3                                          | 191        | 1142.69                  | 10.4552           | 10.4579           | 10.4509           | -442.704   | 1.96       |
| 4_4                                          | 96         | 1144.94                  | 10.4614           | 10.4616           | 10.4616           | -442.625   | 1.99       |
| 4_5                                          | 48         | 1142.68                  | 10.4595           | 10.4595           | 10.4451           | -442.817   | 1.90       |
| 4_6                                          | 96         | 1143.41                  | 10.4608           | 10.4549           | 10.4549           | -442.728   | 1.94       |
| 4_7                                          | 96         | 1143.45                  | 10.4601           | 10.4601           | 10.4511           | -442.934   | 1.83       |
| 4_8                                          | 96         | 1143.27                  | 10.4585           | 10.4585           | 10.4526           | -442.929   | 1.84       |
| 4_9                                          | 48         | 1143.13                  | 10.4644           | 10.4563           | 10.4474           | -442.817   | 1.90       |
| 4_10                                         | 96         | 1142.90                  | 10.4604           | 10.4558           | 10.4499           | -442.808   | 1.90       |
| 4_11                                         | 96         | 1143.24                  | 10.4631           | 10.4530           | 10.4530           | -442.725   | 1.94       |
| 4_12                                         | 96         | 1143.56                  | 10.4626           | 10.4548           | 10.4548           | -442.719   | 1.94       |
| 4_13                                         | 191        | 1143.09                  | 10.4599           | 10.4551           | 10.4527           | -442.715   | 1.95       |
| 4_14                                         | 191        | 1143.42                  | 10.4571           | 10.4599           | 10.4537           | -442.722   | 1.93       |
| 4_15                                         | 191        | 1143.78                  | 10.4581           | 10.4589           | 10.4571           | -442.717   | 1.93       |
| 4_16                                         | 96         | 1143.07                  | 10.4552           | 10.4571           | 10.4552           | -442.611   | 1.99       |
| 4_17                                         | 24         | 1143.95                  | 10.4570           | 10.4570           | 10.4614           | -442.636   | 1.98       |
| 4_18                                         | 12         | 1142.73                  | 10.4522           | 10.4522           | 10.4601           | -442.789   | 1.93       |
| 4_19                                         | 24         | 1142.23                  | 10.4529           | 10.4540           | 10.4529           | -442.611   | 2.00       |
| 4_20                                         | 4          | 1144.81                  | 10.4560           | 10.4638           | 10.4638           | -442.810   | 1.87       |
| 4_21                                         | 12         | 1143.08                  | 10.4559           | 10.4559           | 10.4559           | -443.256   | 1.67       |
| 4_22                                         | 8          | 1142.06                  | 10.4527           | 10.4527           | 10.4527           | -442.574   | 1.98       |
| 4_23                                         | 1          | 1143.51                  | 10.4564           | 10.4578           | 10.4575           | -442.714   | 1.93       |
| 4_24                                         | 1          | 1142.90                  | 10.4520           | 10.4578           | 10.4562           | -442.716   | 1.94       |
| 4_25                                         | 1          | 1143.24                  | 10.4528           | 10.4553           | 10.4611           | -442.716   | 1.95       |
| 4_26                                         | 1          | 1142.35                  | 10.4491           | 10.4575           | 10.4542           | -442.699   | 1.96       |

Table S2. The relaxed lattice constants, degeneracy, total energy and band gap ( $E_g$ ) for  $\text{AgSb}_{1-x}\text{Bi}_x\text{O}_3$  solid-solution with the ilmenite structure.

| il- $\text{AgSb}_{1-x}\text{Bi}_x\text{O}_3$ | Degeneracy | Volume( $\text{\AA}^3$ ) | a( $\text{\AA}$ ) | b( $\text{\AA}$ ) | c( $\text{\AA}$ ) | Energy(eV) | $E_g$ (eV) |
|----------------------------------------------|------------|--------------------------|-------------------|-------------------|-------------------|------------|------------|
| 0                                            | 1          | 1113.99                  | 12.6517           | 12.6517           | 12.6517           | -452.160   | 2.44       |
| 1_1                                          | 16         | 1117.41                  | 12.5738           | 12.5738           | 12.5738           | -449.881   | 2.18       |
| 2_1                                          | 24         | 1117.14                  | 12.4911           | 12.5055           | 12.5109           | -447.663   | 1.95       |
| 2_2                                          | 24         | 1117.11                  | 12.5137           | 12.4962           | 12.5087           | -447.546   | 1.99       |
| 2_3                                          | 8          | 1115.30                  | 12.4847           | 12.4847           | 12.4847           | -447.635   | 1.95       |
| 2_4                                          | 8          | 1117.30                  | 12.4968           | 12.4968           | 12.4968           | -447.645   | 1.93       |
| 2_5                                          | 24         | 1117.14                  | 12.5027           | 12.5000           | 12.5042           | -447.664   | 1.95       |
| 2_6                                          | 24         | 1117.54                  | 12.5421           | 12.5113           | 12.5163           | -447.562   | 2.03       |
| 2_7                                          | 8          | 1116.75                  | 12.5065           | 12.5065           | 12.5065           | -447.642   | 1.96       |
| 3_1                                          | 48         | 1119.22                  | 12.4610           | 12.4369           | 12.4599           | -445.425   | 1.76       |
| 3_2                                          | 48         | 1119.30                  | 12.4559           | 12.4571           | 12.4570           | -445.405   | 1.77       |
| 3_3                                          | 48         | 1118.78                  | 12.4445           | 12.4399           | 12.4387           | -445.519   | 1.70       |
| 3_4                                          | 48         | 1119.77                  | 12.4821           | 12.4384           | 12.4552           | -445.430   | 1.80       |
| 3_5                                          | 48         | 1119.25                  | 12.4694           | 12.4707           | 12.4439           | -445.427   | 1.80       |
| 3_6                                          | 48         | 1119.10                  | 12.4562           | 12.4499           | 12.4715           | -445.416   | 1.80       |
| 3_7                                          | 16         | 1120.51                  | 12.4724           | 12.4724           | 12.4724           | -445.176   | 1.85       |
| 3_8                                          | 48         | 1118.90                  | 12.4895           | 12.4348           | 12.4517           | -445.281   | 1.81       |
| 3_9                                          | 48         | 1120.07                  | 12.4585           | 12.4509           | 12.4736           | -445.419   | 1.77       |
| 3_10                                         | 48         | 1119.33                  | 12.4628           | 12.4495           | 12.4568           | -445.403   | 1.77       |
| 3_11                                         | 48         | 1119.01                  | 12.4671           | 12.4708           | 12.4841           | -445.203   | 1.89       |
| 3_12                                         | 16         | 1118.67                  | 12.4404           | 12.4404           | 12.4404           | -445.487   | 1.72       |
| 3_13                                         | 48         | 1119.24                  | 12.4510           | 12.4506           | 12.4818           | -445.409   | 1.80       |
| 4_1                                          | 12         | 1122.15                  | 12.4232           | 12.4023           | 12.4172           | -443.256   | 1.59       |
| 4_2                                          | 16         | 1121.79                  | 12.4169           | 12.4169           | 12.4169           | -443.123   | 1.64       |
| 4_3                                          | 48         | 1120.96                  | 12.4067           | 12.3978           | 12.3926           | -443.241   | 1.59       |
| 4_4                                          | 48         | 1121.47                  | 12.4108           | 12.3971           | 12.4064           | -443.120   | 1.63       |
| 4_5                                          | 48         | 1120.82                  | 12.3952           | 12.3852           | 12.4041           | -443.358   | 1.53       |
| 4_6                                          | 48         | 1120.74                  | 12.4281           | 12.3834           | 12.4039           | -443.230   | 1.61       |
| 4_7                                          | 48         | 1121.44                  | 12.4415           | 12.3979           | 12.4062           | -443.230   | 1.61       |
| 4_8                                          | 48         | 1121.63                  | 12.4359           | 12.4001           | 12.4220           | -443.241   | 1.64       |
| 4_9                                          | 48         | 1121.99                  | 12.4204           | 12.4305           | 12.4338           | -443.143   | 1.69       |
| 4_10                                         | 48         | 1120.97                  | 12.4069           | 12.4183           | 12.4008           | -443.234   | 1.63       |
| 4_11                                         | 48         | 1121.16                  | 12.4059           | 12.4063           | 12.4252           | -443.230   | 1.64       |
| 4_12                                         | 48         | 1121.01                  | 12.4069           | 12.4104           | 12.4240           | -443.132   | 1.68       |
| 4_13                                         | 12         | 1121.31                  | 12.4058           | 12.4026           | 12.4060           | -443.216   | 1.60       |
| 4_14                                         | 48         | 1120.27                  | 12.3893           | 12.3911           | 12.4209           | -443.211   | 1.60       |
| 4_15                                         | 48         | 1120.67                  | 12.3880           | 12.3914           | 12.4058           | -443.326   | 1.54       |
| 4_16                                         | 48         | 1121.05                  | 12.4228           | 12.4059           | 12.4001           | -443.228   | 1.63       |

---

|      |    |         |         |         |         |          |      |
|------|----|---------|---------|---------|---------|----------|------|
| 4_17 | 48 | 1122.27 | 12.4373 | 12.4322 | 12.4258 | -443.126 | 1.70 |
| 4_18 | 48 | 1121.53 | 12.4046 | 12.4403 | 12.3936 | -443.234 | 1.63 |
| 4_19 | 48 | 1120.96 | 12.4234 | 12.4215 | 12.3964 | -443.127 | 1.68 |
| 4_20 | 48 | 1120.22 | 12.3910 | 12.3928 | 12.4187 | -443.190 | 1.62 |
| 4_21 | 48 | 1119.49 | 12.3913 | 12.3867 | 12.4154 | -443.207 | 1.63 |
| 4_22 | 12 | 1121.14 | 12.3903 | 12.3936 | 12.3862 | -443.462 | 1.48 |
| 4_23 | 48 | 1121.17 | 12.4294 | 12.3954 | 12.4018 | -443.351 | 1.58 |
| 4_24 | 48 | 1121.17 | 12.4228 | 12.3964 | 12.4083 | -443.221 | 1.62 |
| 4_25 | 48 | 1121.71 | 12.4133 | 12.4311 | 12.3994 | -443.226 | 1.61 |
| 4_26 | 48 | 1121.39 | 12.3977 | 12.3949 | 12.4260 | -443.219 | 1.61 |
| 4_27 | 48 | 1120.57 | 12.3994 | 12.3906 | 12.4223 | -443.320 | 1.57 |
| 4_28 | 12 | 1121.66 | 12.4638 | 12.3970 | 12.4117 | -443.244 | 1.68 |
| 4_29 | 48 | 1121.76 | 12.4389 | 12.4371 | 12.4040 | -443.139 | 1.69 |
| 4_30 | 48 | 1121.18 | 12.4313 | 12.4177 | 12.3988 | -443.228 | 1.67 |
| 4_31 | 48 | 1121.00 | 12.4210 | 12.4040 | 12.4190 | -443.233 | 1.67 |
| 4_32 | 48 | 1121.24 | 12.4346 | 12.4006 | 12.4214 | -443.131 | 1.69 |
| 4_33 | 12 | 1121.21 | 12.4125 | 12.4521 | 12.3859 | -443.247 | 1.67 |
| 4_34 | 48 | 1121.31 | 12.4187 | 12.4265 | 12.4152 | -443.127 | 1.69 |
| 4_35 | 12 | 1120.30 | 12.4046 | 12.4041 | 12.4319 | -443.215 | 1.67 |
| 4_36 | 4  | 1122.23 | 12.4411 | 12.4411 | 12.4411 | -442.743 | 1.76 |
| 4_37 | 48 | 1121.92 | 12.4464 | 12.4359 | 12.4217 | -442.875 | 1.74 |
| 4_38 | 16 | 1122.74 | 12.4288 | 12.4288 | 12.4288 | -443.112 | 1.65 |
| 4_39 | 48 | 1121.85 | 12.4106 | 12.4043 | 12.4165 | -443.110 | 1.65 |
| 4_40 | 16 | 1122.75 | 12.4612 | 12.4612 | 12.4612 | -442.806 | 1.81 |
| 4_41 | 12 | 1121.58 | 12.4662 | 12.4135 | 12.4080 | -442.954 | 1.72 |
| 4_42 | 48 | 1121.23 | 12.4393 | 12.4296 | 12.4220 | -442.889 | 1.76 |
| 4_43 | 48 | 1120.76 | 12.4339 | 12.3955 | 12.3997 | -443.186 | 1.62 |
| 4_44 | 12 | 1122.03 | 12.4177 | 12.4120 | 12.4233 | -443.233 | 1.60 |
| 4_45 | 48 | 1121.78 | 12.4206 | 12.4003 | 12.4058 | -443.233 | 1.60 |
| 4_46 | 48 | 1121.60 | 12.4063 | 12.4261 | 12.4368 | -443.120 | 1.69 |
| 4_47 | 12 | 1121.64 | 12.4121 | 12.4207 | 12.4119 | -443.206 | 1.61 |
| 4_48 | 12 | 1121.79 | 12.4231 | 12.4651 | 12.4629 | -442.816 | 1.83 |
| 4_49 | 4  | 1120.51 | 12.3955 | 12.3955 | 12.3955 | -443.380 | 1.52 |
| 4_50 | 12 | 1120.42 | 12.3991 | 12.3951 | 12.4469 | -443.203 | 1.67 |

---
